# Supplementary material for: Modeling Start Curves of Bainite Formation
Source: Springer Nature journal article supplement (doi:10.1007/s11661-009-0106-9), 2009-12-01

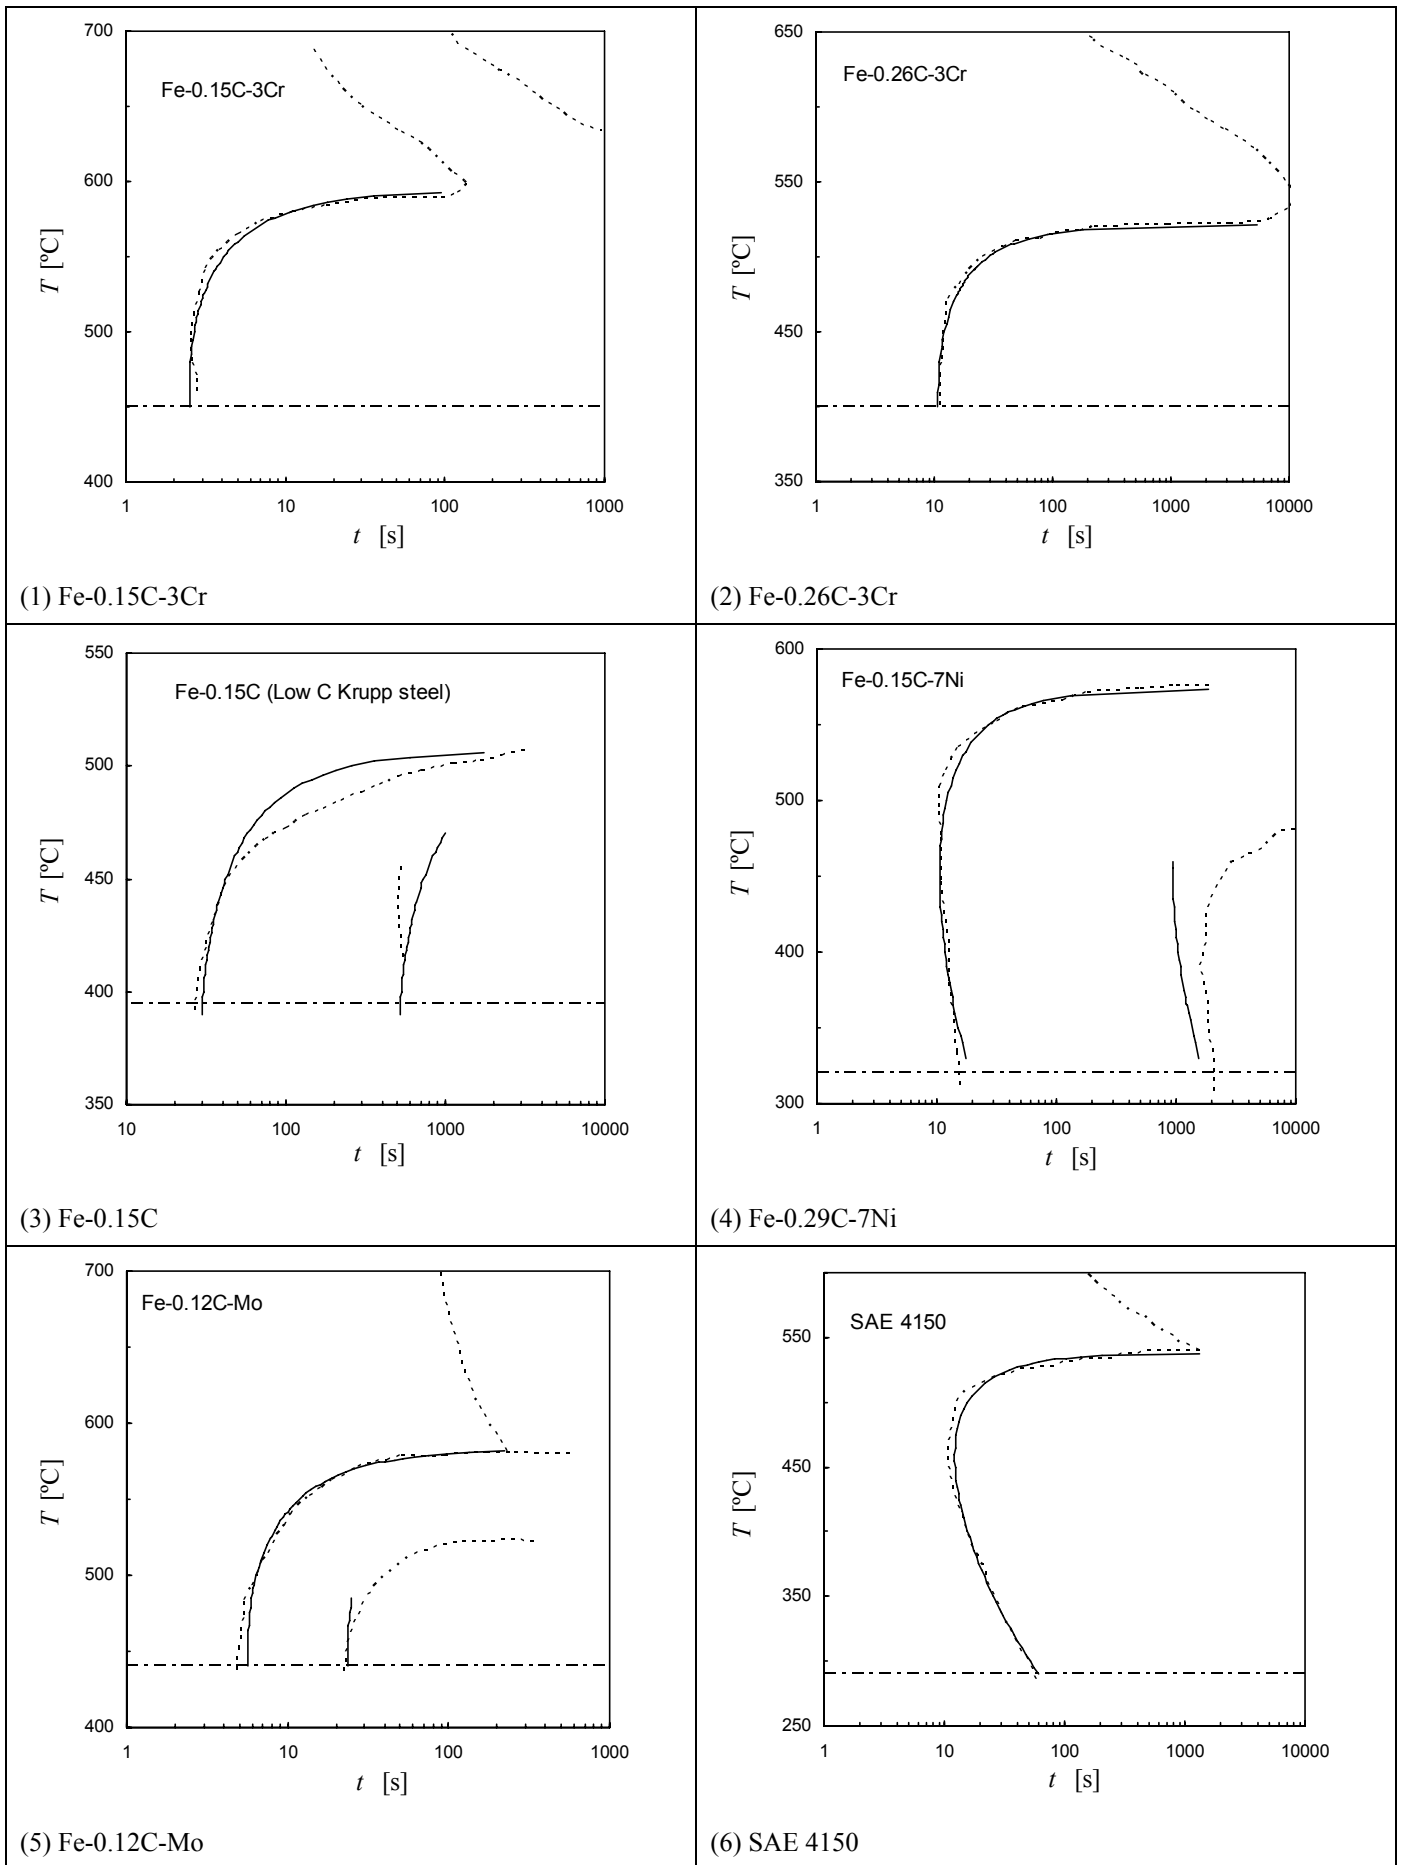

Figure 1. Alloys 1 - 6: experimental (dotted line) and calculated (solid line) start-curves.

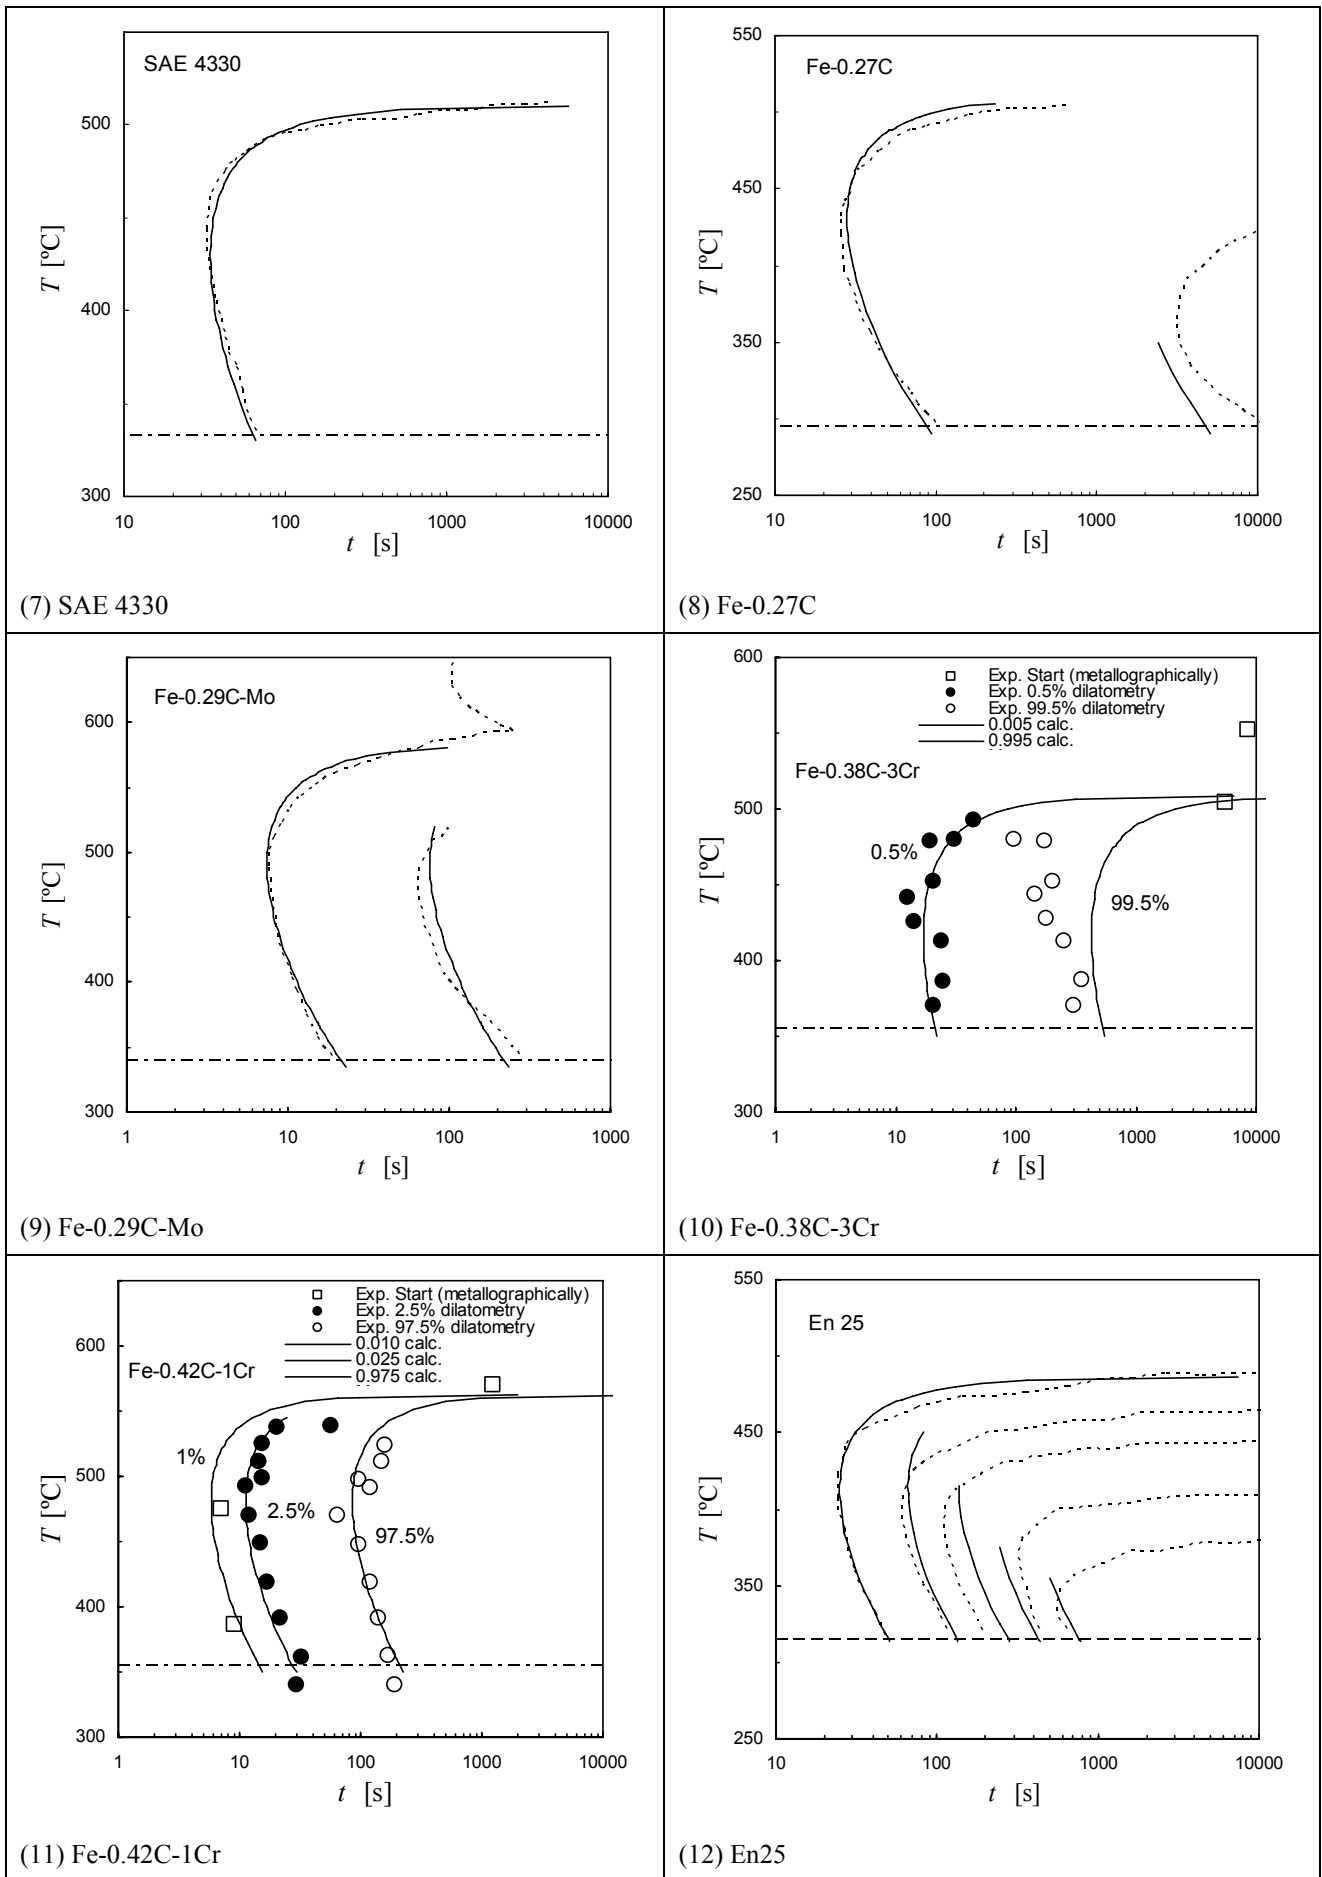

Figure 2. Alloys 7 - 12: experimental (dotted line) and calculated (solid line) start-curves.

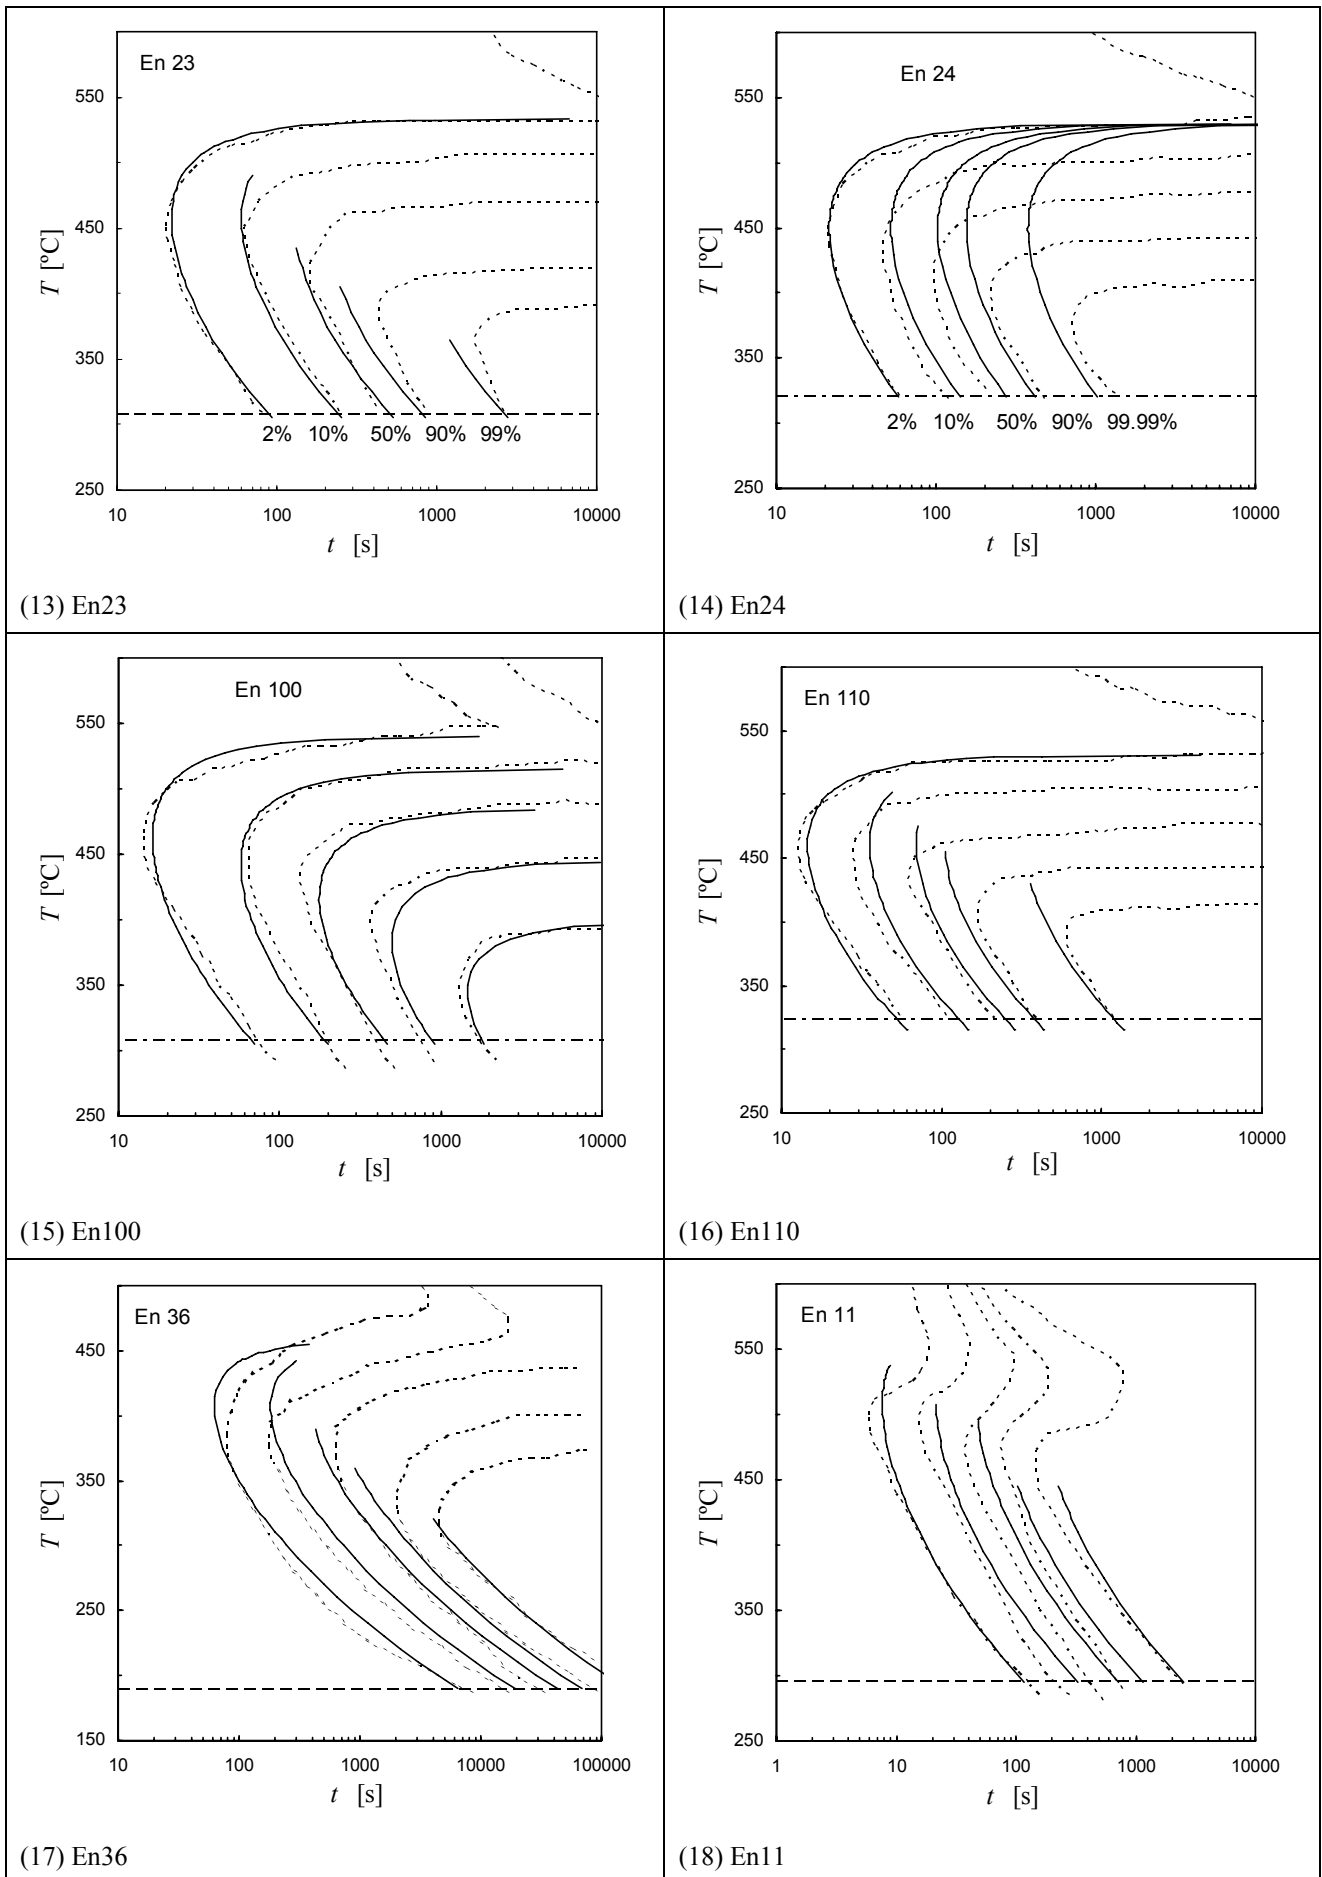

Figure 3. Alloys 13 - 18: experimental (dotted line) and calculated (solid line) start-curves.

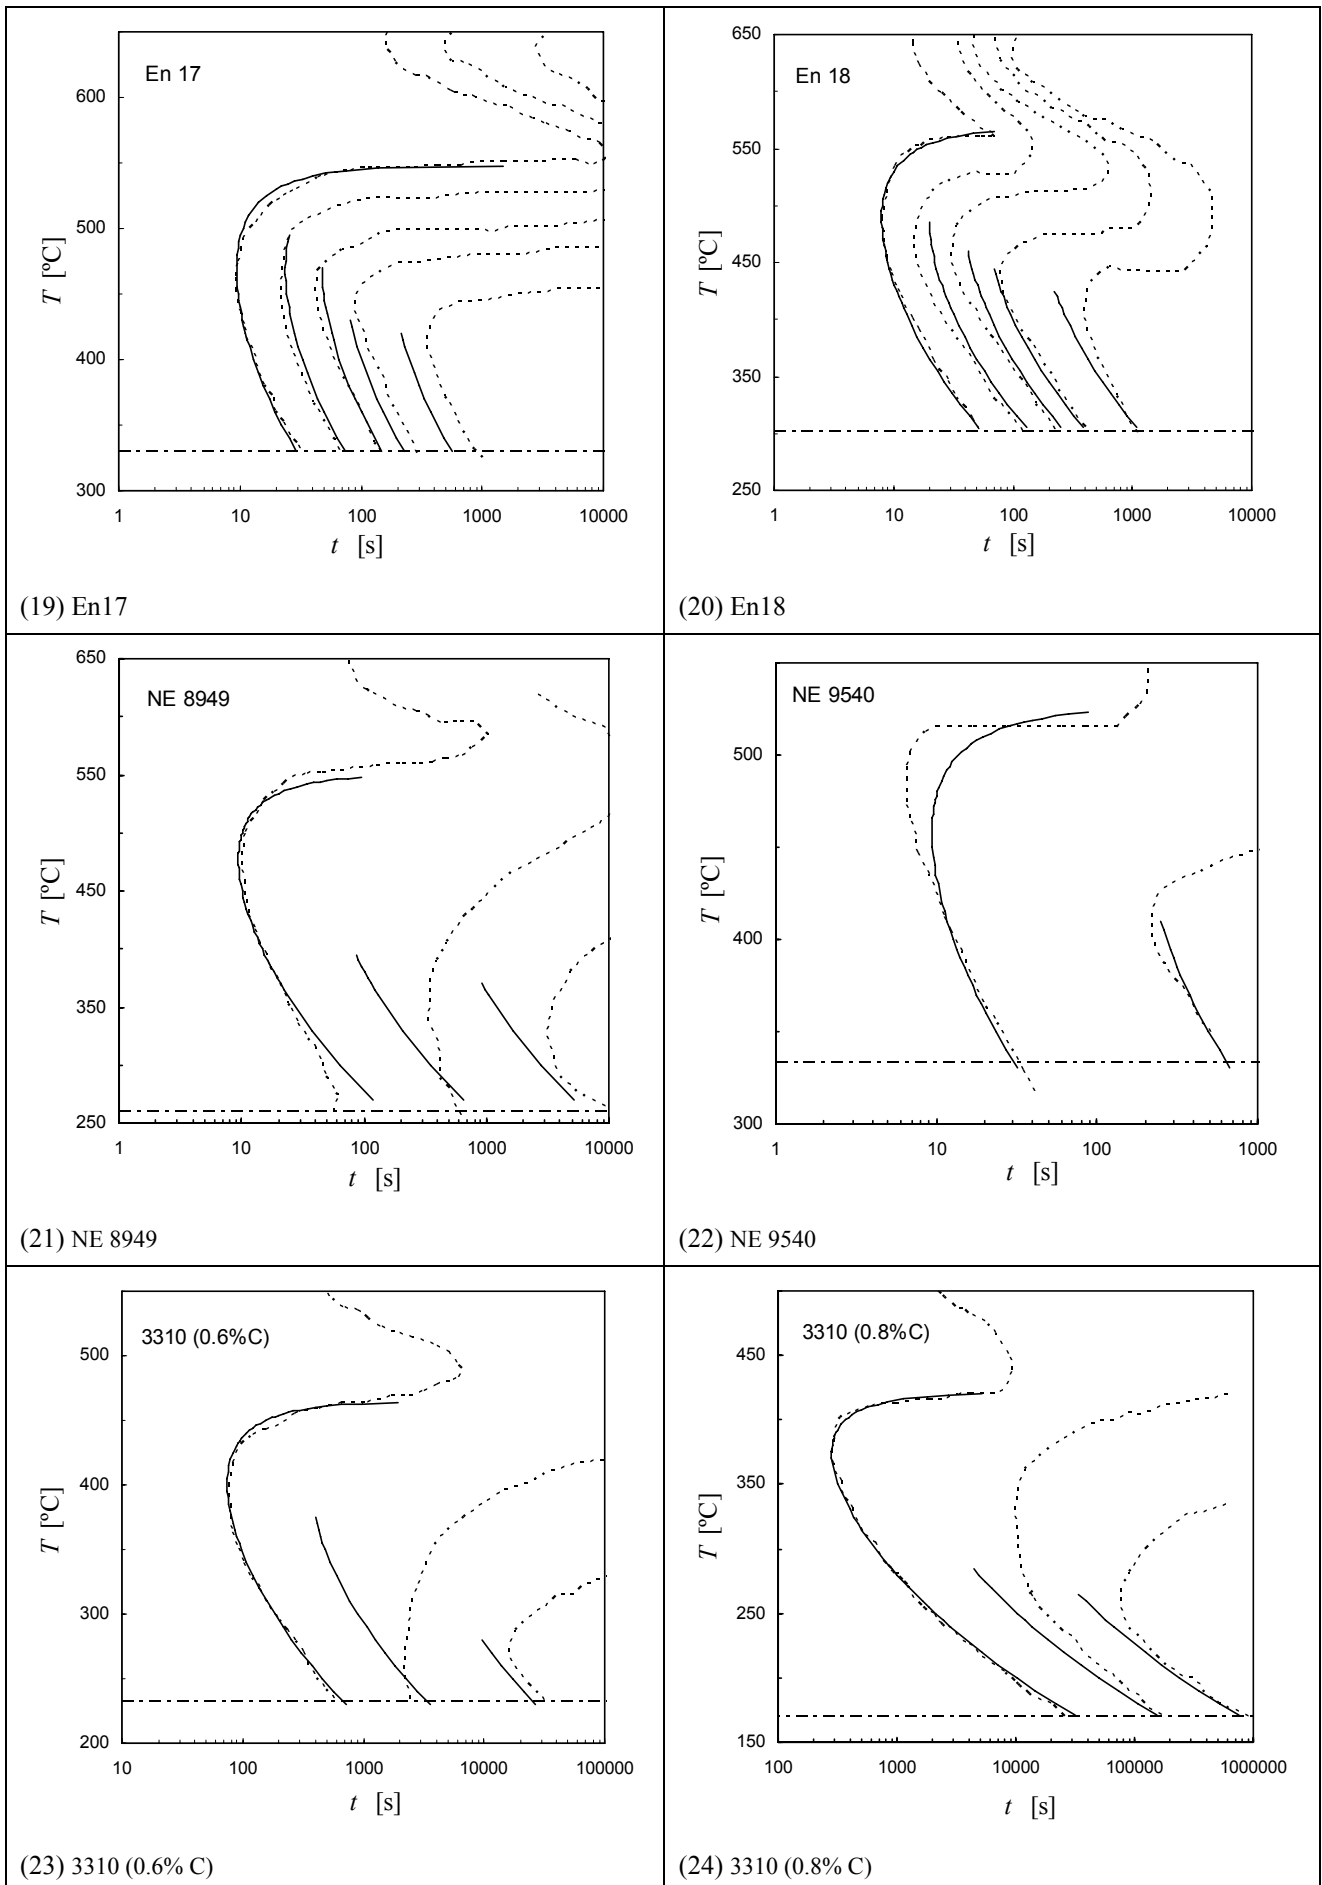

**Figure 4. Alloys 19 - 24: experimental (dotted line) and calculated (solid line) start-curves.**

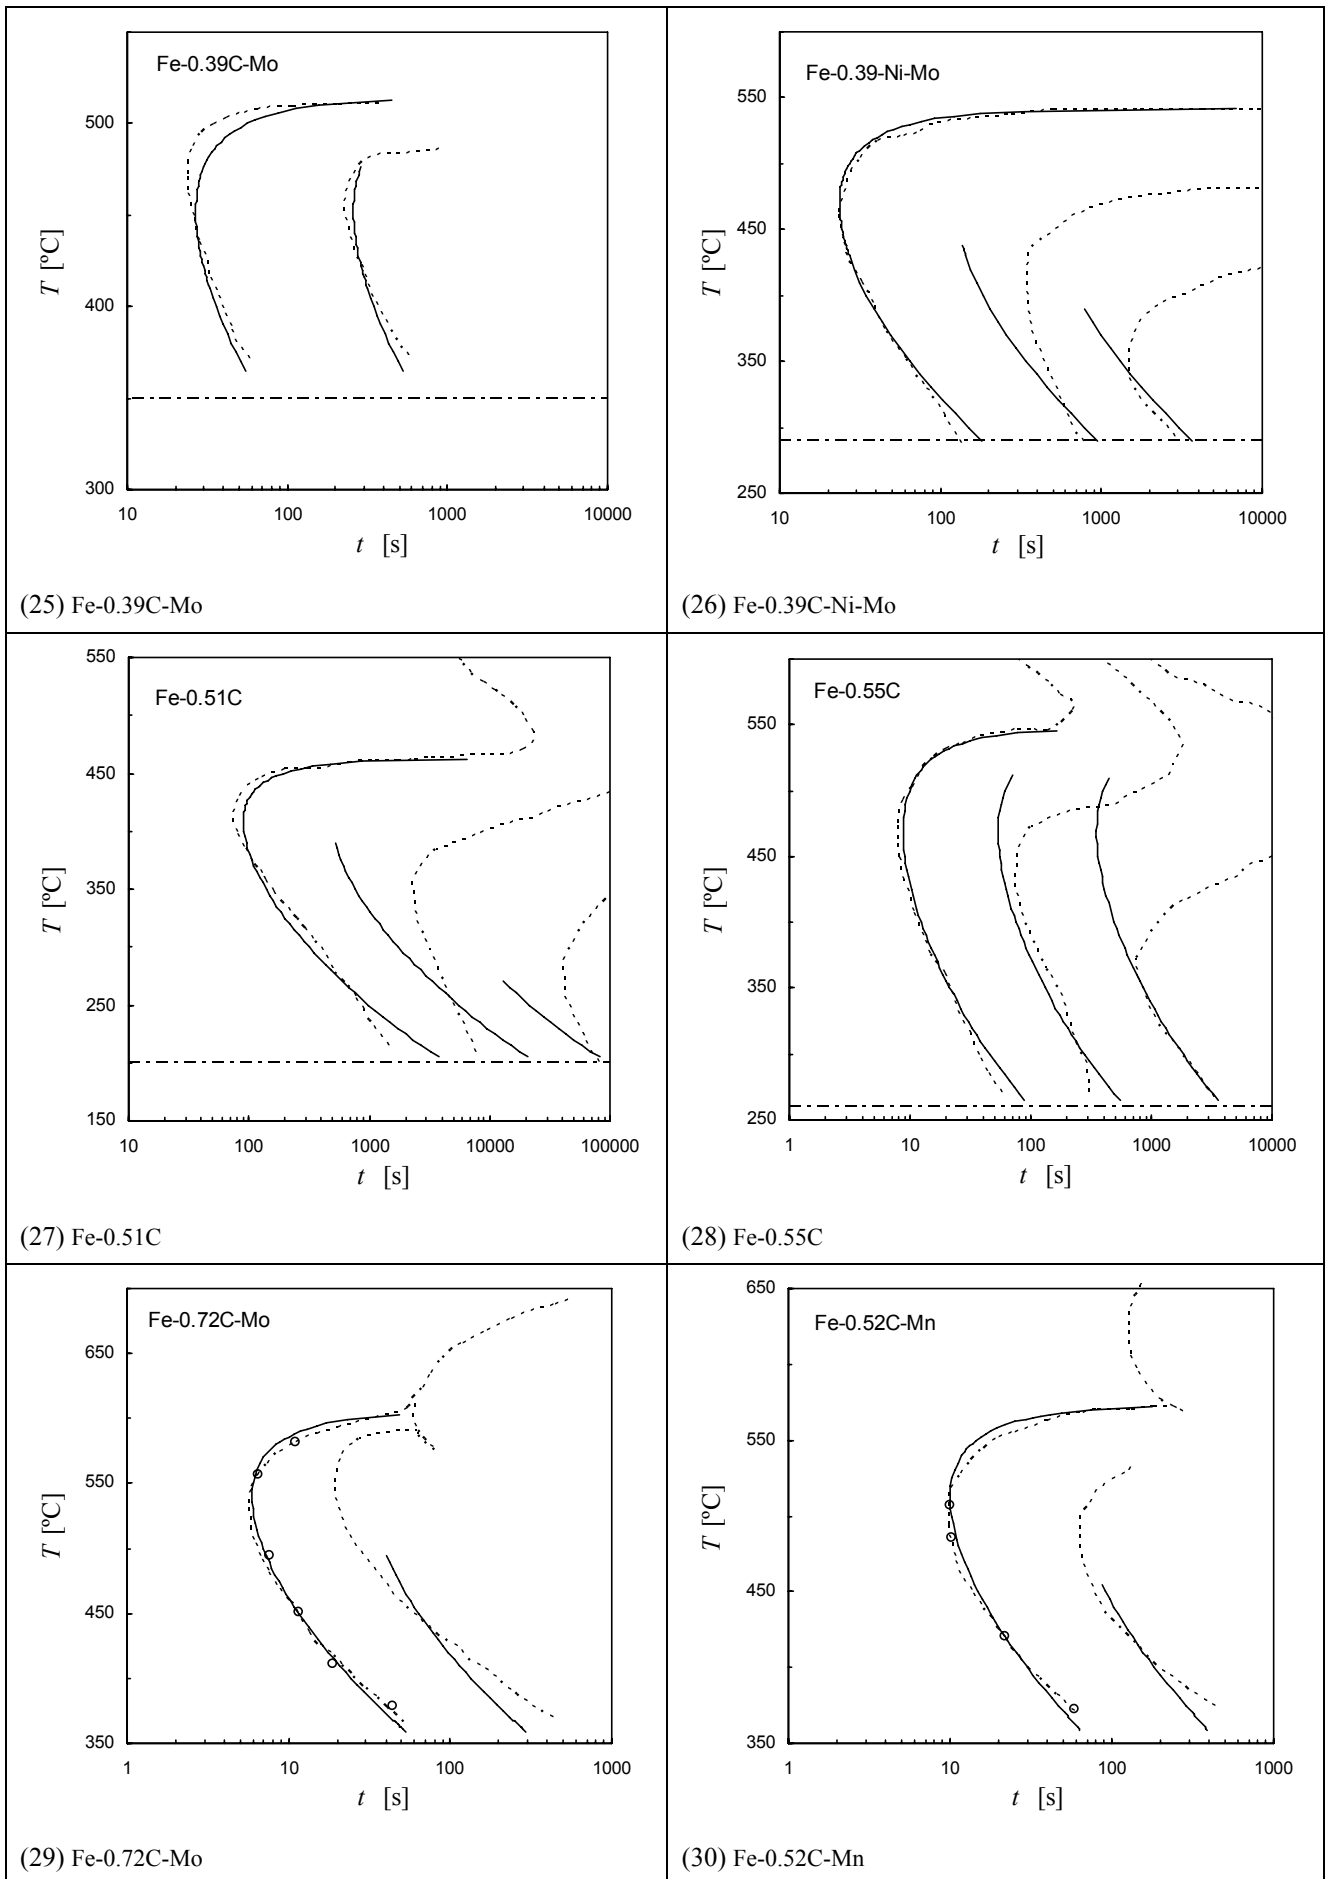

Figure 5. Alloys 25 - 30: experimental (dotted line) and calculated (solid line) start-curves.

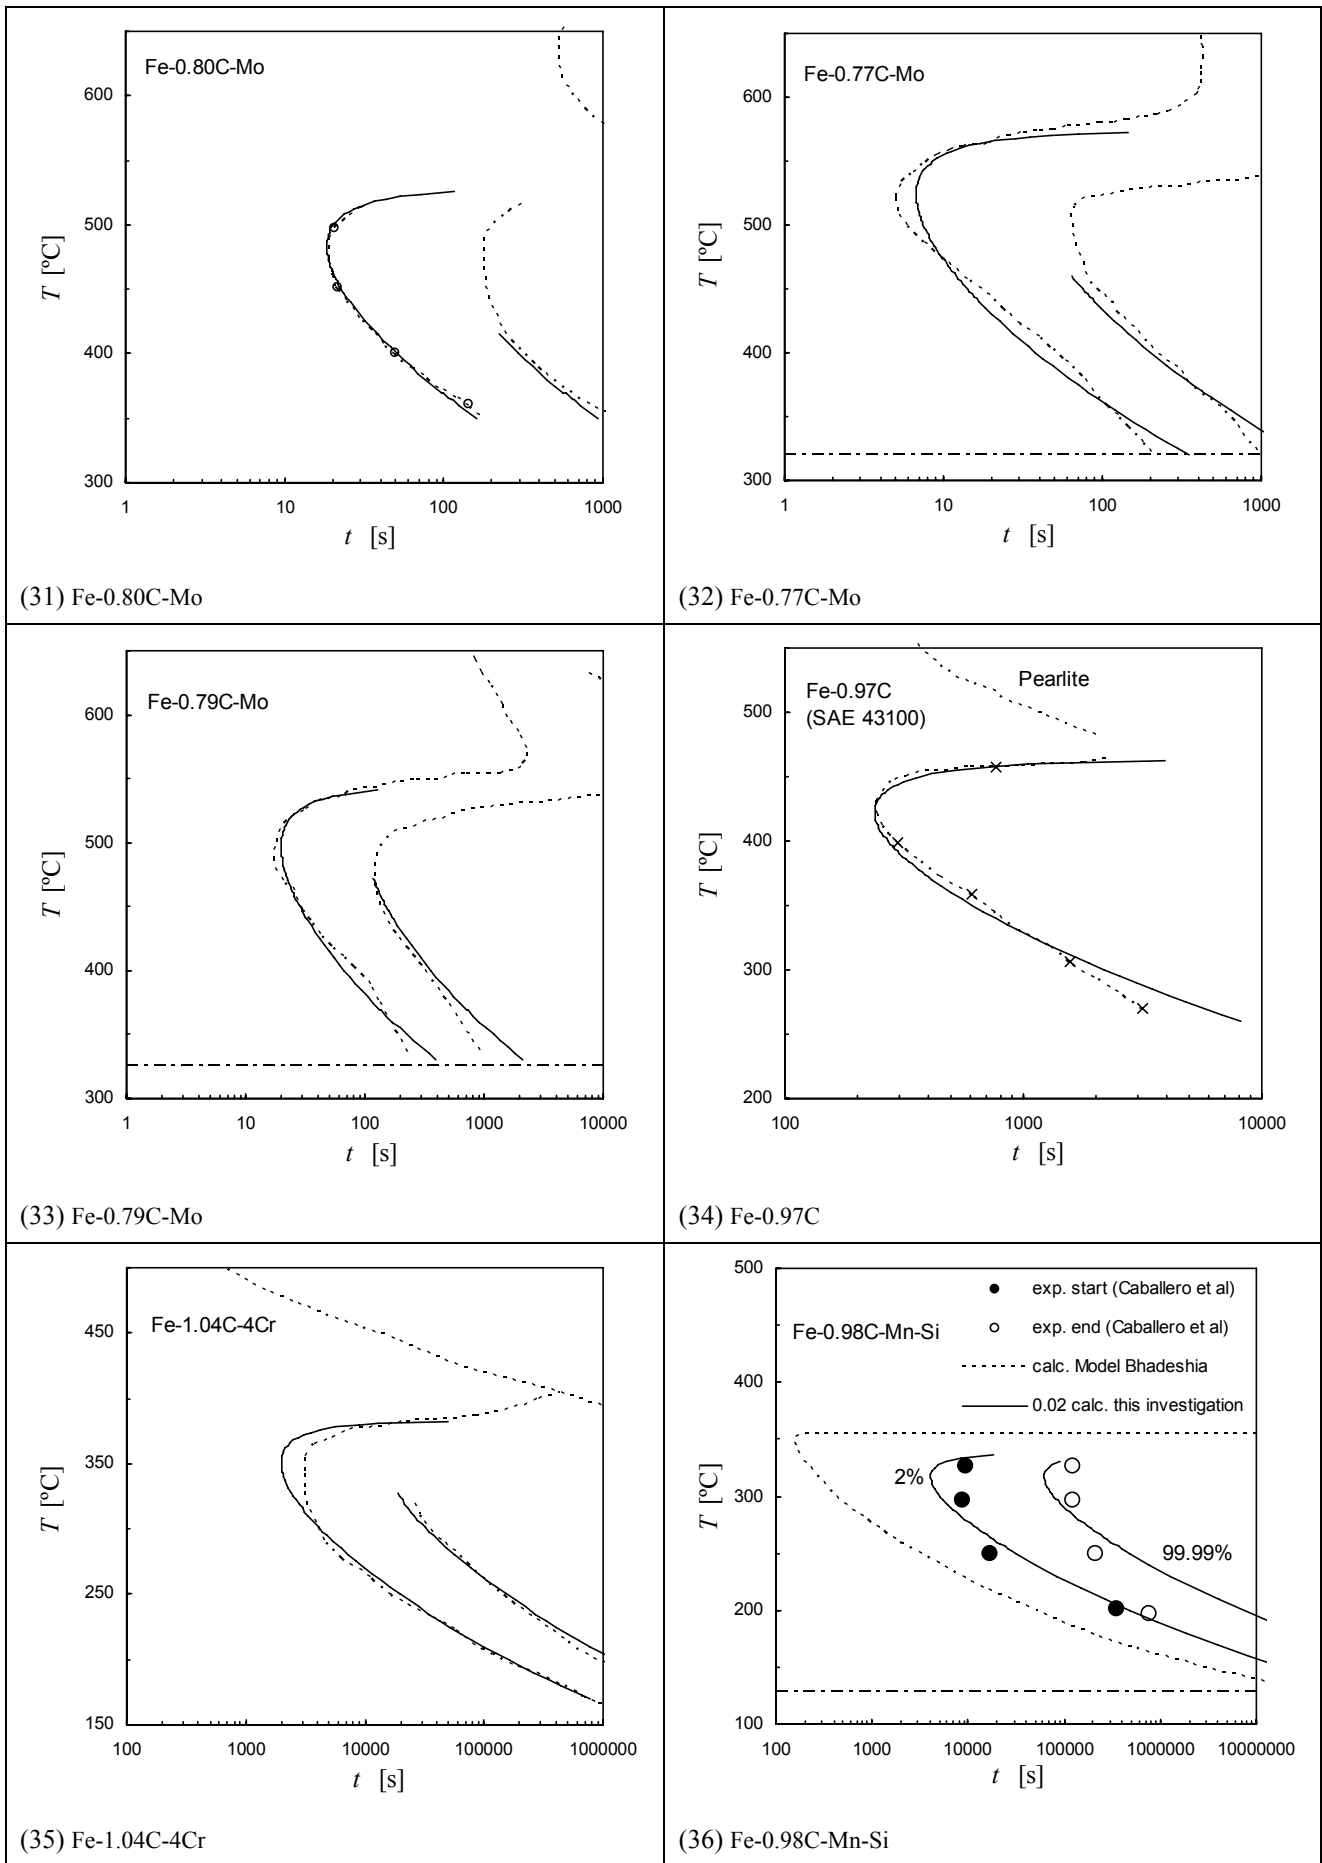

Figure 6. Alloys 31 - 36: experimental (dotted line) and calculated (solid line) start-curves.

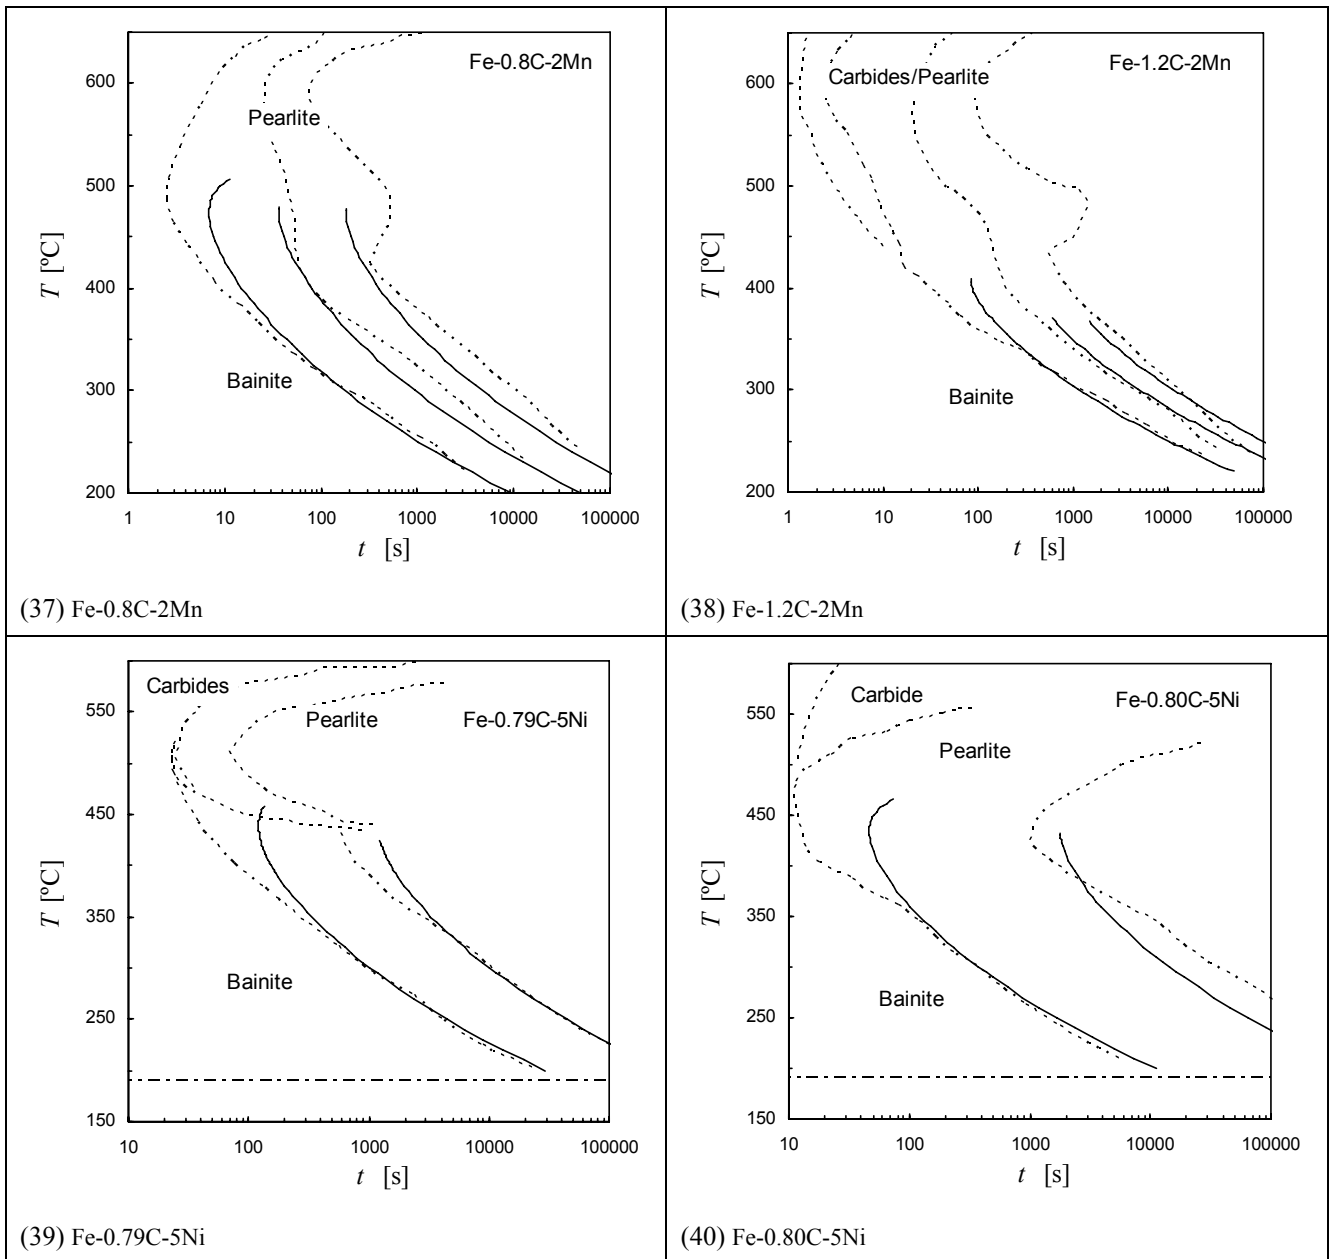

**Figure 7. Alloys 37 - 40: experimental (dotted line) and calculated (solid line) start-curves.**

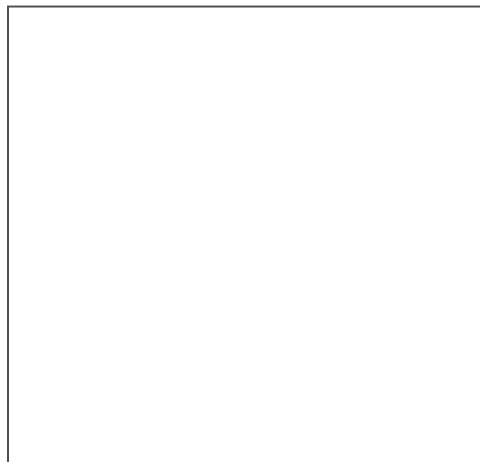

Supplement: MOESM1 [file 5919440]
